# Supplementary material
Source: Royal Society of Chemistry journal article supplement (doi:10.1039/d5ta09290f)
Supplement: d5ta09290f1.pdf [file d5ta09290f1.pdf]

## Supplementary Information

# Calcium Pyrenide: A Room-Temperature Reagent for Stoichiometric Calciations and Reductive $\text{Ca}^{2+}$ Intercalation Reactions

Anda Wang<sup>†,1</sup>, Ryan S. Storteboom<sup>†,1</sup>, Shain Sagar Mollick<sup>†</sup>, Serhii Vasylevskyi<sup>†</sup>, Michael L. Aubrey<sup>†,\*</sup>

<sup>†</sup>Department of Chemistry, The University of Texas at Austin, Austin, TX 78712, USA.

<sup>1</sup>Authors contributed equally

### Table of Contents

|                                                                                                                           |     |
|---------------------------------------------------------------------------------------------------------------------------|-----|
| Single crystal data of $\text{Ca}(\text{THF})_6(\text{pyrene})_2(\text{pyrenide}^-)_2$ .....                              | S2  |
| PXRD for silver deposition.....                                                                                           | S4  |
| Select bond lengths in the $\text{Ca}(\text{THF})_6(\text{pyrene})_2(\text{pyrenide}^-)_2$ single crystal structure. .... | S5  |
| EPR of calcium pyrenide in THF.....                                                                                       | S6  |
| Additional UV- <i>vis</i> absorption spectra.....                                                                         | S7  |
| CV with expanded electrochemical window .....                                                                             | S10 |
| CV reaction kinetics.....                                                                                                 | S11 |
| Elemental analysis of calcium insertion into $\text{MoS}_2$ .....                                                         | S15 |
| Thermogravimetric analysis of calcium insertion into $\text{MoS}_2$ .....                                                 | S18 |
| PXRD of $\text{MoS}_2$ before and after stirring in DMF.....                                                              | S20 |
| References.....                                                                                                           | S20 |

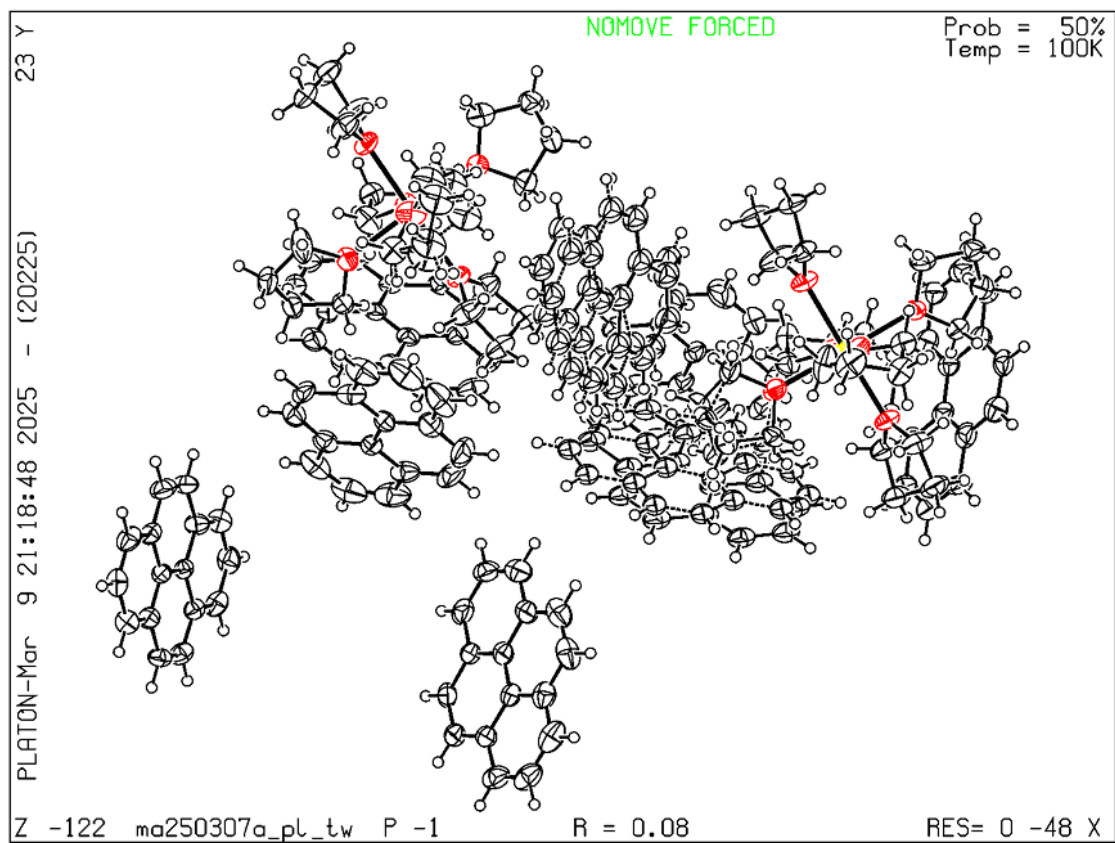

**Figure S1.** Asymmetric unit for  $\text{Ca}(\text{THF})_6(\text{pyrene})_2(\text{pyrenide}^-)_2$ .

**Table S1.** Crystallographic data for Ca(THF)<sub>6</sub>(pyrene)<sub>2</sub>(pyrenide<sup>-</sup>)<sub>2</sub>

|                                                           |                                                                                  |
|-----------------------------------------------------------|----------------------------------------------------------------------------------|
| Compound                                                  | Ca(THF) <sub>6</sub> (pyrene) <sub>2</sub> (pyrenide <sup>-</sup> ) <sub>2</sub> |
| Empirical Formula                                         | C88H88CaO6                                                                       |
| Formula weight (g/mol)                                    | 1281.66                                                                          |
| Temperature (K)                                           | 100                                                                              |
| Crystal system                                            | Triclinic                                                                        |
| Space group                                               | P-1                                                                              |
| <i>a</i> (Å)                                              | 14.6514(2)                                                                       |
| <i>b</i> (Å)                                              | 21.4427(4)                                                                       |
| <i>c</i> (Å)                                              | 21.4763(5)                                                                       |
| Volume (Å <sup>3</sup> )                                  | 6728.1(2)                                                                        |
| <i>Z</i>                                                  | 4                                                                                |
| Density, calc. (g/cm <sup>3</sup> )                       | 1.265                                                                            |
| Absorption coefficient (mm <sup>-1</sup> )                | 1.254                                                                            |
| <i>F</i> (000)                                            | 2736                                                                             |
| Radiation                                                 | Cu Kα (λ=1.54184 Å)                                                              |
| Completeness to θ <sub>max</sub>                          | 67.684                                                                           |
| Data/restraints/parameters                                | 24815/1056/2022                                                                  |
| Goodness-of-fit on <i>F</i> <sup>2</sup>                  | 1.062                                                                            |
| Final R indices [ <i>I</i> >2 σ( <i>I</i> )] <sup>a</sup> | <i>R</i> <sub>1</sub> = 0.0752, <i>wR</i> <sub>2</sub> = 0.1956                  |
| Largest diff. peak/hole (e/Å <sup>3</sup> )               | 0.612                                                                            |

$$^a R_1 = \frac{\sum ||F_o| - |F_c||}{\sum |F_o|}, wR_2 = \left[ \frac{\sum w(F_o^2 - F_c^2)^2}{\sum (F_o^2)^2} \right]^{1/2}$$

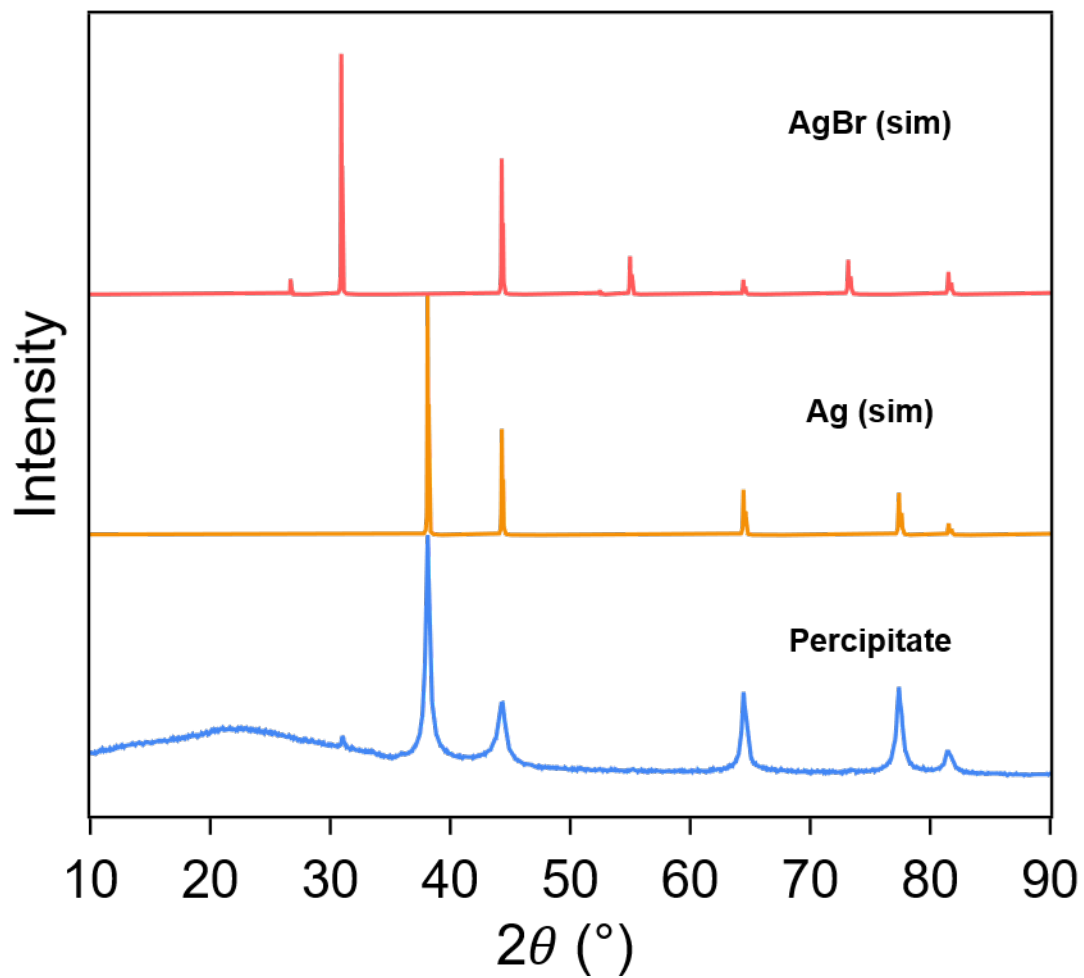

**Figure S2.** PXRd pattern for Ag deposition product (blue) and simulated PXRd patterns from Ag (yellow) and AgBr (red) references.<sup>41,42</sup>



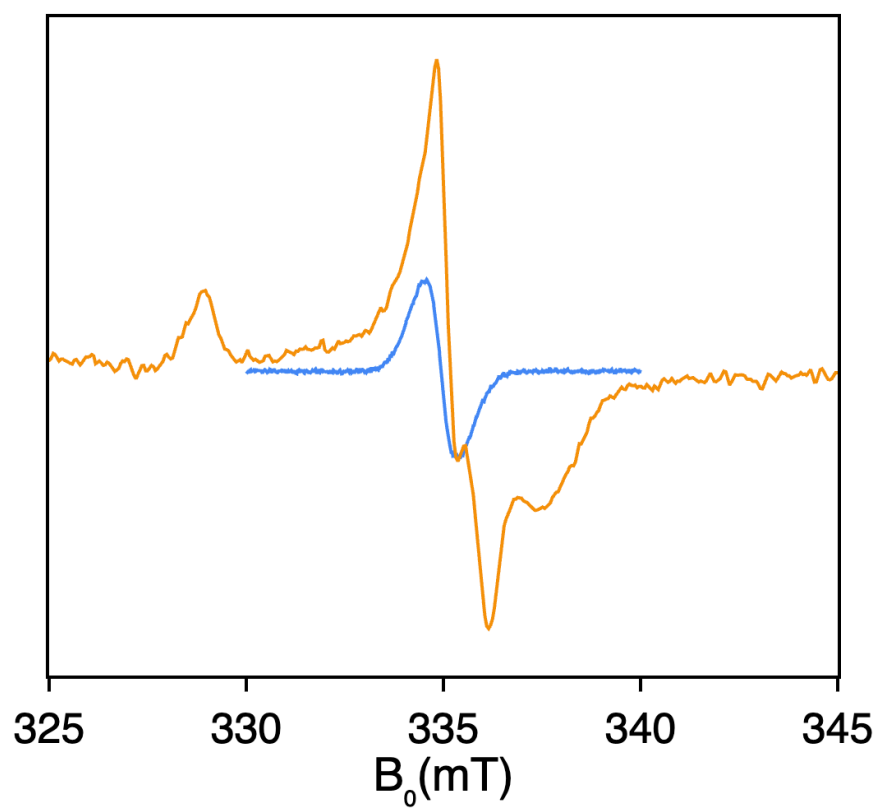

**Figure S4.** EPR of the product solution following reaction of excess pyrene with calcium and 8.5 mol% 1,2-dibromoethane in THF. Spectra were collected at room temperature (blue) and 106 K (orange).

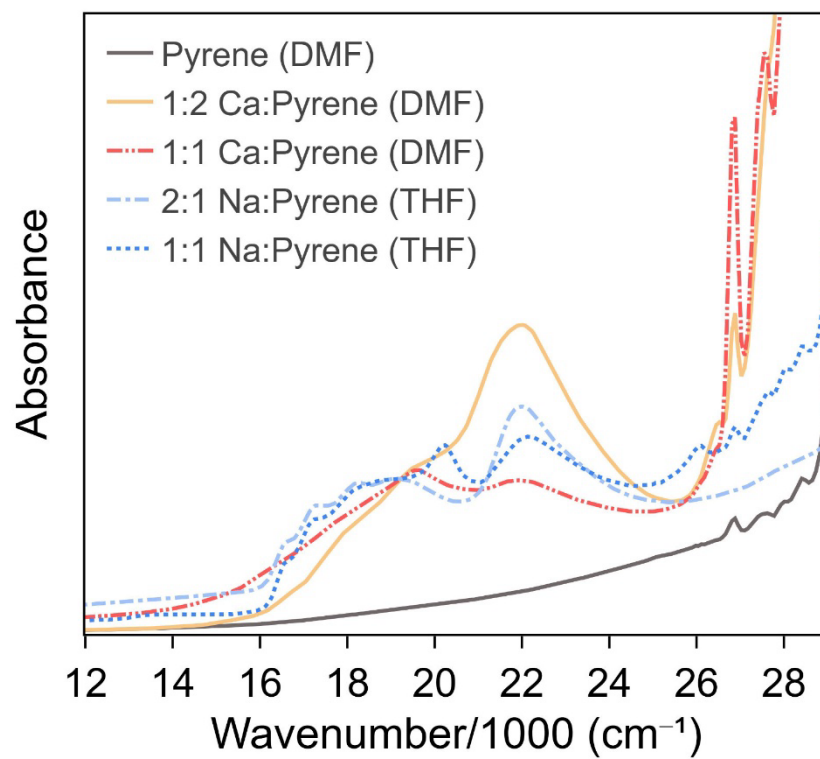

**Figure S5.** UV-*vis* absorption spectra of pyrene (grey, solid), pyrene solution reacted with  $\frac{1}{2}$  equivalent (light orange, solid) and 1 equivalent (red, dash-dot-dot) of calcium in DMF, and with 2 equivalents (light blue, dash-dot) and 1 equivalent (blue, dot) of sodium in THF.

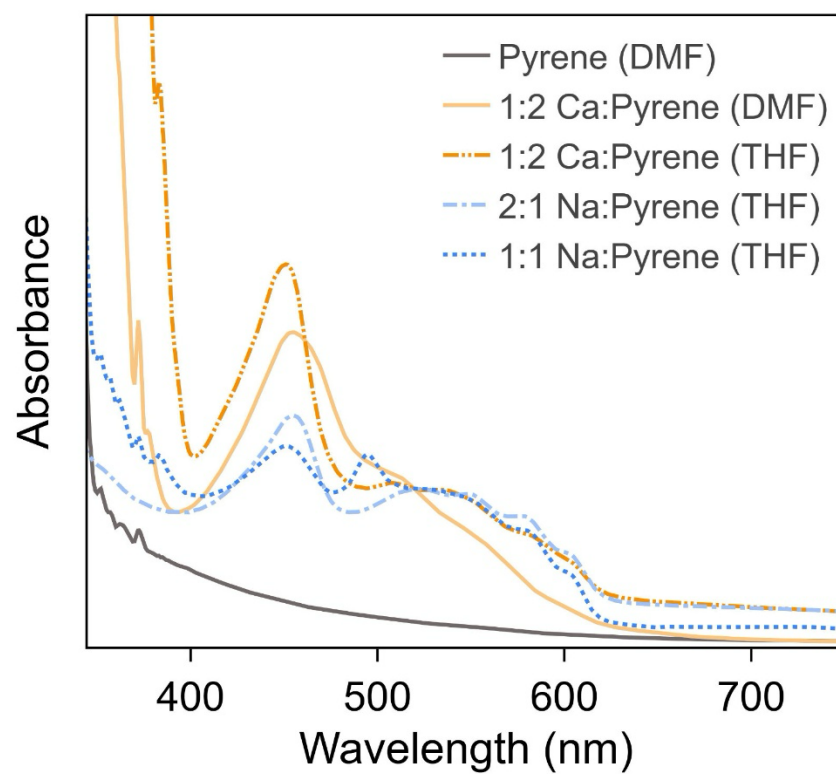

**Figure S6.** UV-*vis* absorption spectra of pyrene in DMF (grey, solid), a pyrene solution reacted with  $\frac{1}{2}$  equivalent of calcium in DMF (light orange, solid) and THF (orange, dash-dot-dot), and pyrene reacted with 2 equivalents (light blue, dash-dot) and 1 equivalent (blue, dot) of sodium in THF.

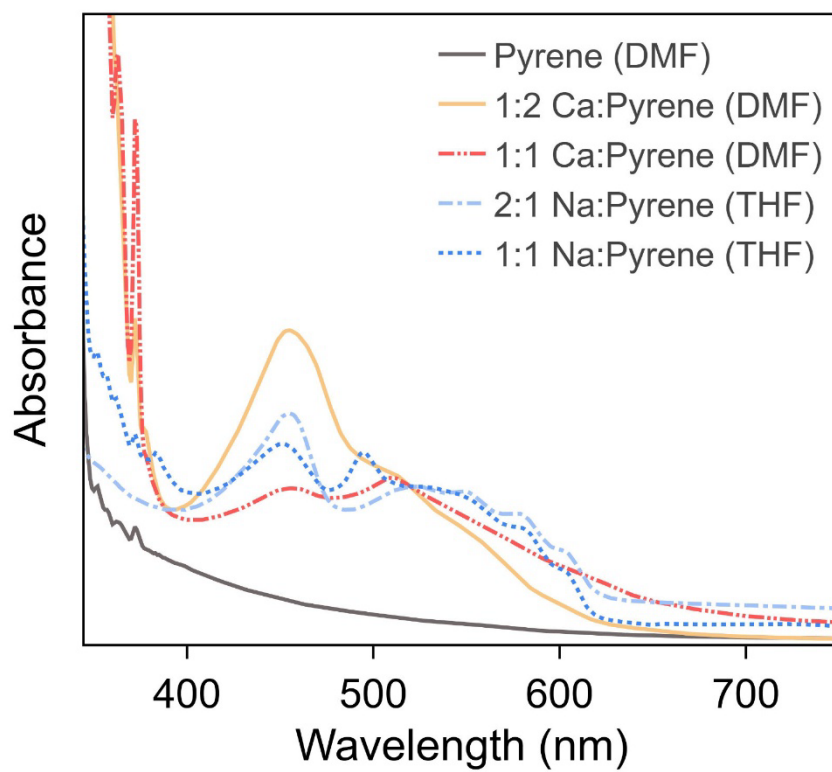

**Figure S7.** UV-*vis* absorption spectra of pyrene (grey, solid), pyrene solution reacted with  $\frac{1}{2}$  equivalent (light orange, solid) and 1 equivalent (red, dash-dot-dot) of calcium in DMF, and with 2 equivalents (light blue, dash-dot) and 1 equivalent (blue, dot) of sodium in THF.

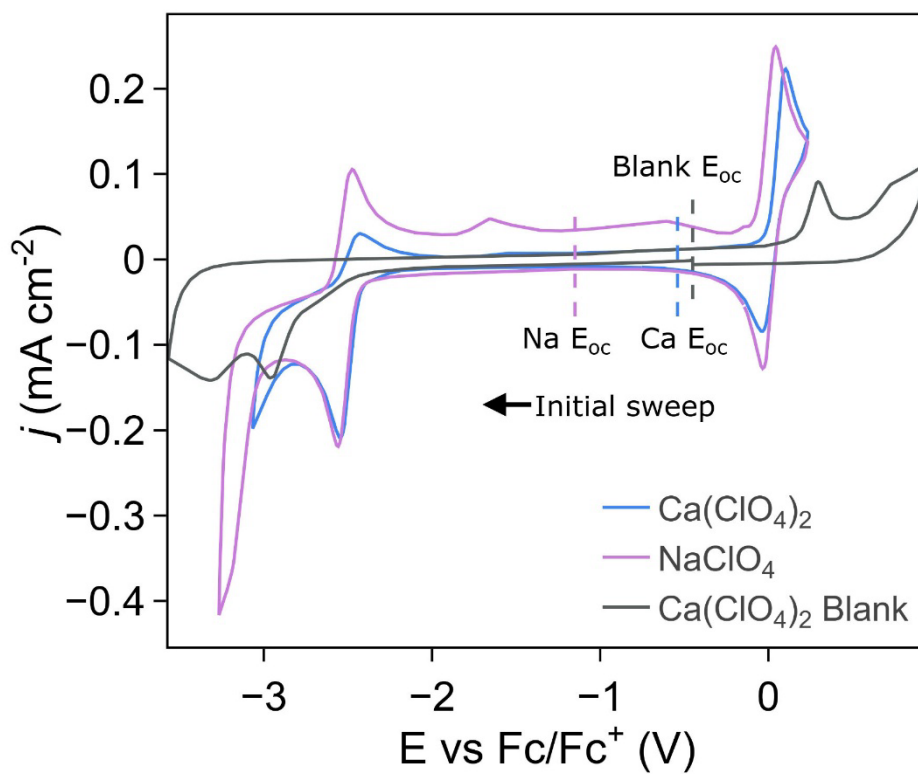

**Figure S8.** CV with electrochemical stability window, showing an expanded negative window for 1 mM pyrene, 1 mM ferrocene, and 0.1 M  $\text{Ca}(\text{ClO}_4)_2$  (blue) or 0.1 M  $\text{NaClO}_4$  (purple). The pure electrolyte solution, 0.1 M  $\text{Ca}(\text{ClO}_4)_2$ , is shown in grey.

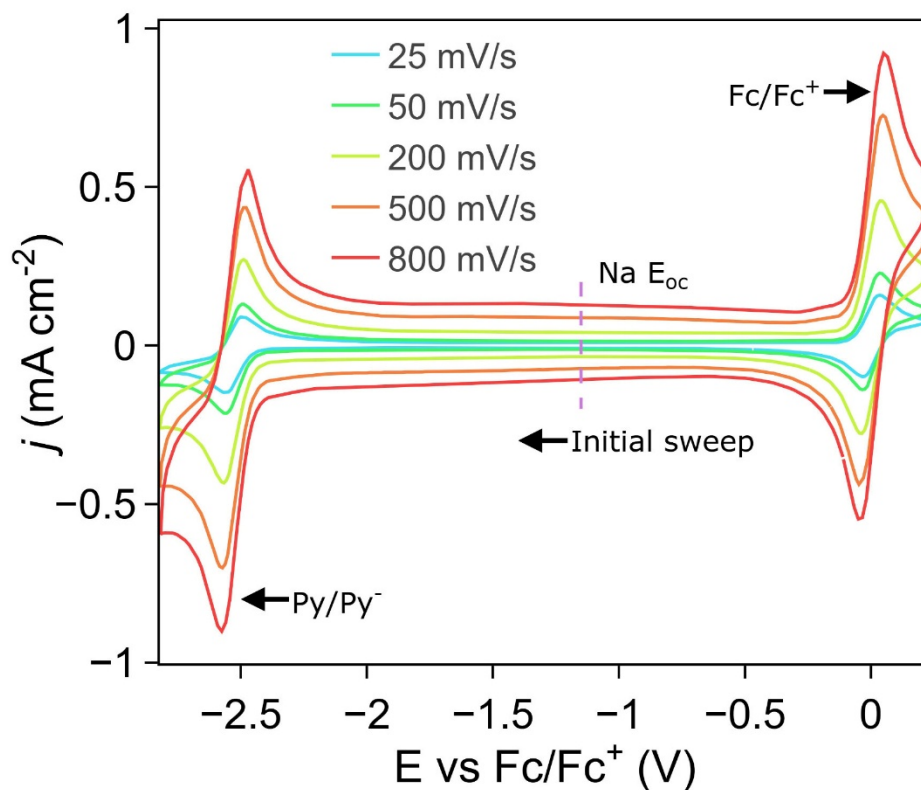

**Figure S9.** Cyclic voltammogram of 1 mM pyrene, 1 mM ferrocene, and 0.1 M NaClO<sub>4</sub> in DMF collected using a glassy carbon working electrode, platinum wire counter electrode, and silver / silver nitrate reference electrode at various scan rates.

**Table S2.** Peak potentials ( $E$ ) and peak separations ( $\Delta E$ ) for 1 mM pyrene and 1 mM ferrocene within a 0.1 M NaClO<sub>4</sub> DMF electrolyte solution at various scan rates.

| $\nu$ (mV/s) | Py/Py <sup>-</sup> |              |                 | Fc/Fc <sup>+</sup> |              |                 |
|--------------|--------------------|--------------|-----------------|--------------------|--------------|-----------------|
|              | $E_{red}$ (V)      | $E_{ox}$ (V) | $\Delta E$ (mV) | $E_{red}$ (V)      | $E_{ox}$ (V) | $\Delta E$ (mV) |
| 25           | -2.5579            | -2.4911      | 67              | -0.0344            | 0.0344       | 69              |
| 50           | -2.5566            | -2.4868      | 70              | -0.0341            | 0.0341       | 68              |
| 200          | -2.5666            | -2.4885      | 78              | -0.0355            | 0.0355       | 71              |
| 500          | -2.5726            | -2.4784      | 94              | -0.0475            | 0.0475       | 95              |
| 800          | -2.5756            | -2.4706      | 105             | -0.0501            | 0.0501       | 100             |

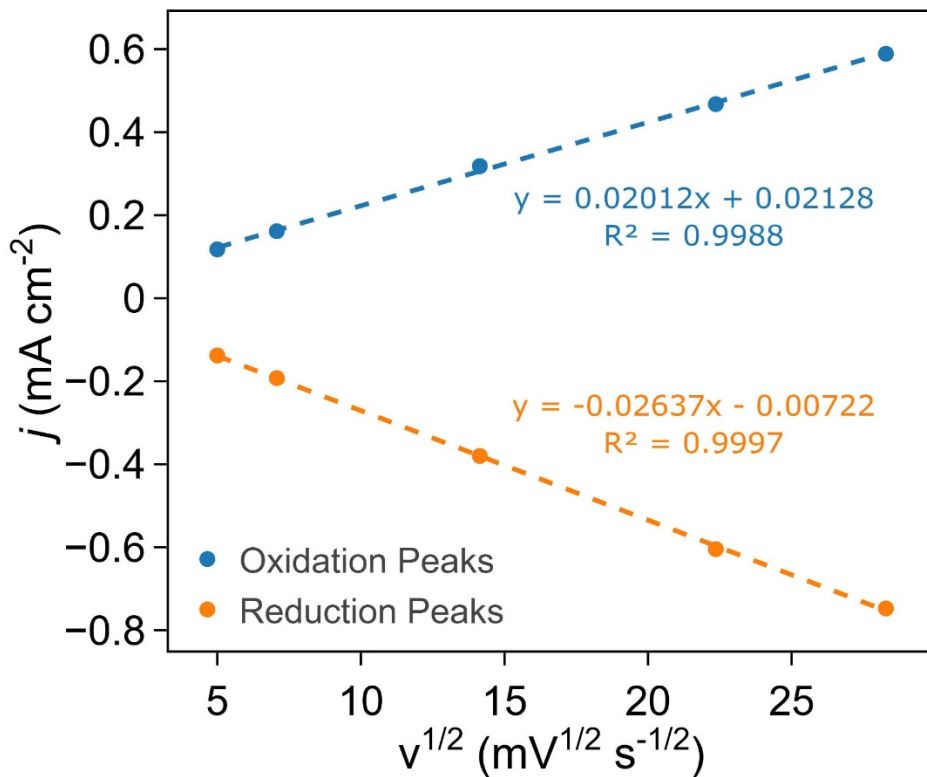

Figure S10. Oxidation and reduction peak currents for the pyrene/pyrene<sup>-</sup> redox couple.

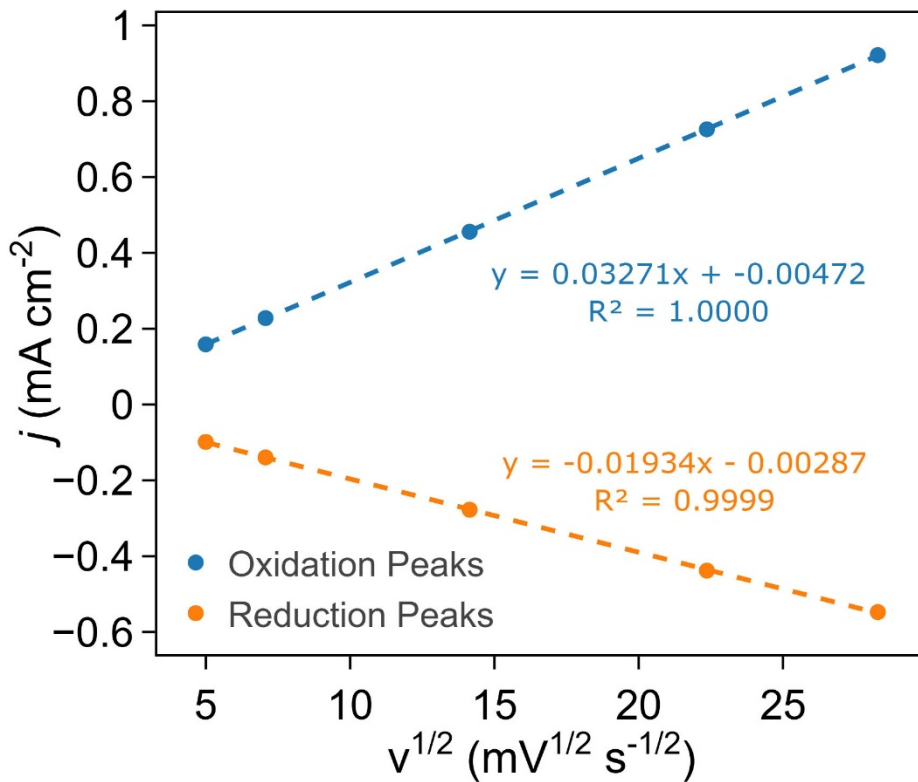

Figure S11. Oxidation and reduction peak currents for the Fc/Fc<sup>+</sup> redox couple.

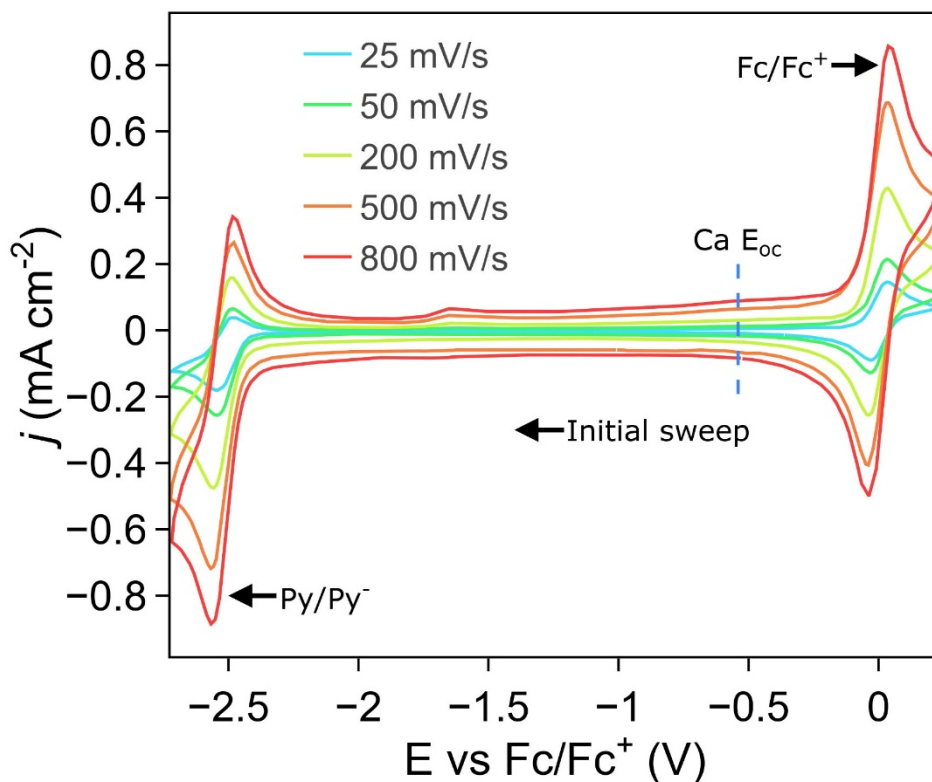

**Figure S12.** Cyclic voltammogram of 1 mM pyrene, 1 mM ferrocene, 0.1 M  $\text{Ca}(\text{ClO}_4)_2$  in DMF collected using a glassy carbon working electrode, Pt wire counter electrode, and  $\text{Ag}/\text{AgNO}_3$  reference electrode at various scan rates.

**Table S3.** Peak potentials ( $E$ ) and peak separations ( $\Delta E$ ), for 1 mM pyrene and 1 mM ferrocene in a 0.1 M  $\text{Ca}(\text{ClO}_4)_2$  DMF electrolyte solution at various scan rates.

| $\nu$ (mV/s) | Py/Py <sup>-</sup> |              |                 | Fc/Fc <sup>+</sup> |              |                 |
|--------------|--------------------|--------------|-----------------|--------------------|--------------|-----------------|
|              | $E_{red}$ (V)      | $E_{ox}$ (V) | $\Delta E$ (mV) | $E_{red}$ (V)      | $E_{ox}$ (V) | $\Delta E$ (mV) |
| 25           | -2.5412            | -2.4795      | 62              | -0.0321            | 0.0321       | 64              |
| 50           | -2.5422            | -2.4872      | 55              | -0.0340            | 0.0340       | 68              |
| 200          | -2.5565            | -2.4908      | 66              | -0.0358            | 0.0358       | 72              |
| 500          | -2.5674            | -2.4784      | 89              | -0.0391            | 0.0391       | 78              |
| 800          | -2.5663            | -2.4828      | 84              | -0.0372            | 0.0372       | 74              |

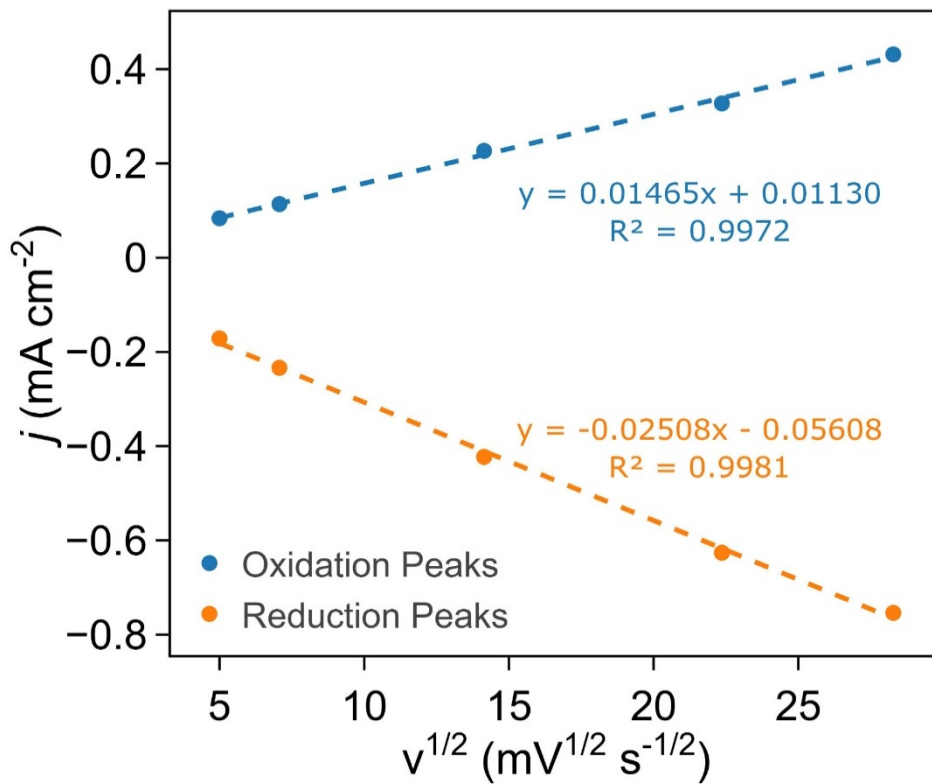

Figure S13. Oxidation and reduction peak current densities for the Pyrene/Pyrene<sup>-</sup> redox couple.

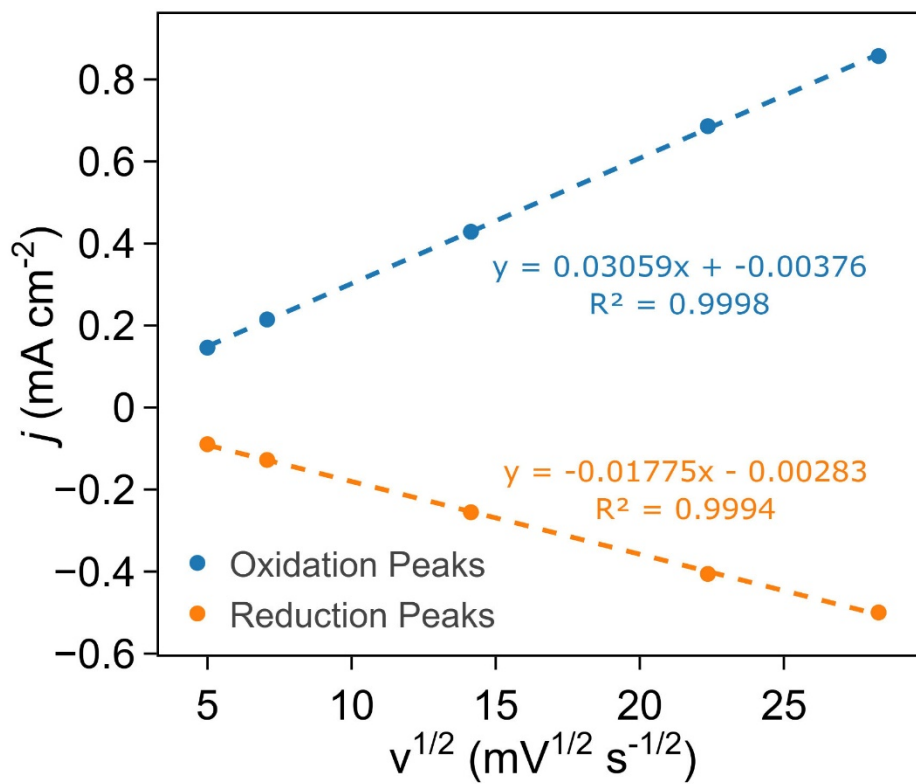

Figure S14. Oxidation and reduction peak currents for the Fc/Fc<sup>+</sup> redox couple.

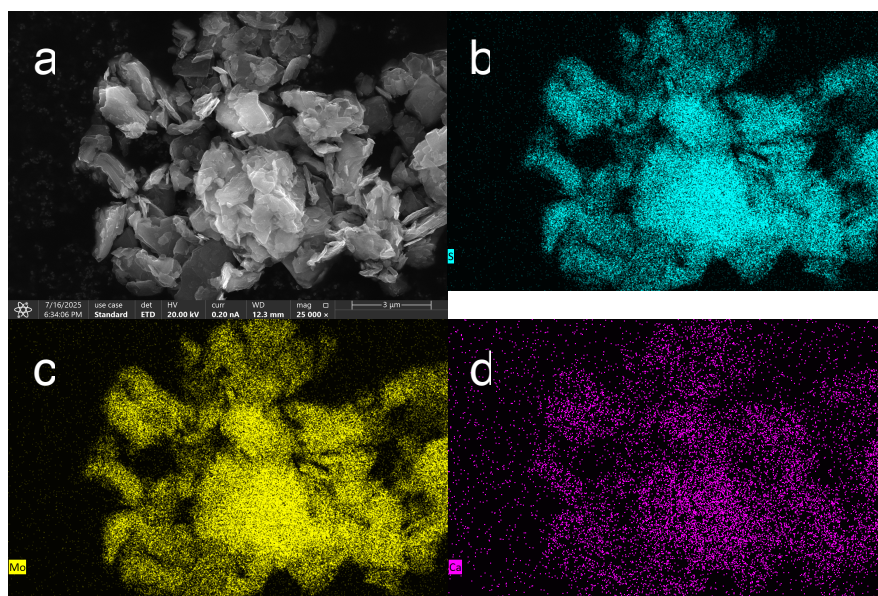

**Figure S15.** (a) SEM image of MoS<sub>2</sub> after reaction with 0.3 equivalents of calcium pyrenide in DMF and elemental mapping of (b) S, (c) Mo, and (d) Ca.

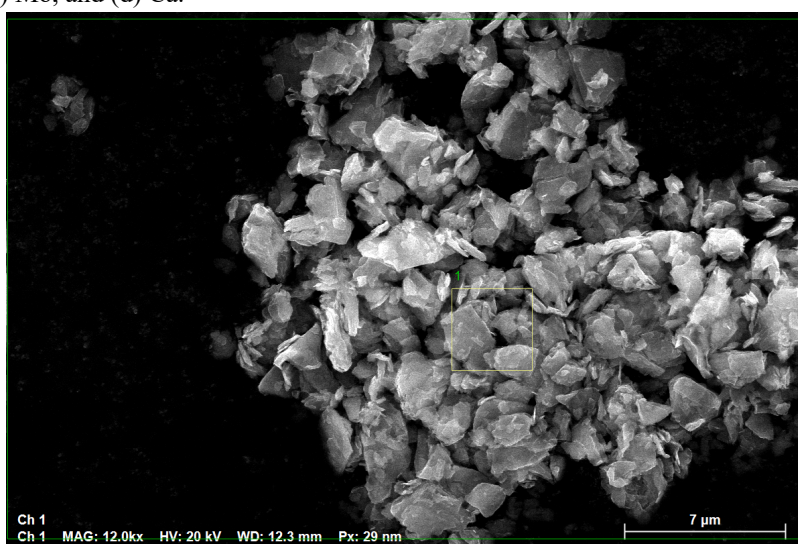

**Figure S16.** EDX spot of MoS<sub>2</sub> after reaction with 0.3 equivalents of calcium pyrenide in DMF.

**Table S4.** Elemental analysis from the EDX spot in Figure S15 for MoS<sub>2</sub> after reaction with 0.3 equivalents of calcium pyrenide in DMF.

| Element    | Counts | Atom percent (%) | 1 $\sigma$ Uncertainty (%) |
|------------|--------|------------------|----------------------------|
| Carbon     | 301    | 70.24            | 2.41                       |
| Oxygen     | 85     | 9.36             | 0.91                       |
| Sulfur     | 4859   | 12.85            | 2.05                       |
| Calcium    | 420    | 2.24             | 0.48                       |
| Molybdenum | 3674   | 5.31             | 4.59                       |

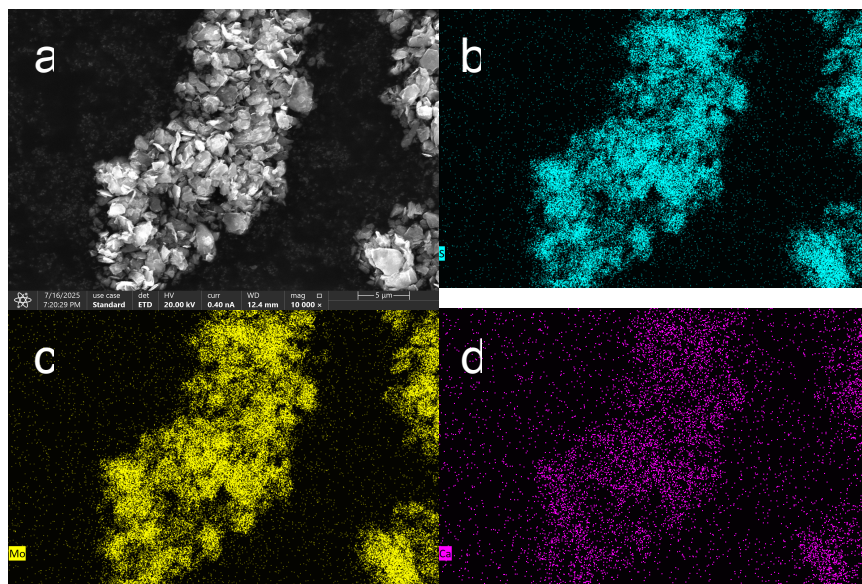

**Figure S17.** (a) SEM image of MoS<sub>2</sub> after reaction with 0.5 equivalents of calcium pyrenide in DMF and elemental mapping of (b) S, (c) Mo, and (d) Ca.

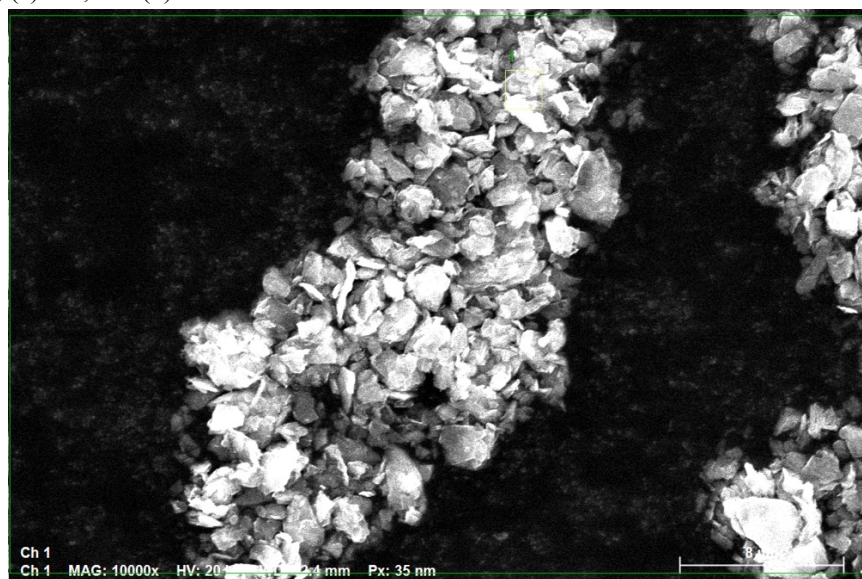

**Figure S18.** EDX spot of MoS<sub>2</sub> after reaction with 0.5 equivalents of calcium pyrenide in DMF.

**Table S5.** Elemental analysis from the EDX spot in Figure S17 for MoS<sub>2</sub> after reaction with 0.5 equivalents of calcium pyrenide in DMF.

| Element    | Counts | Atom percent (%) | 1 $\sigma$ Uncertainty (%) |
|------------|--------|------------------|----------------------------|
| Carbon     | 235    | 86.83            | 4.57                       |
| Oxygen     | 15     | 4.73             | 1.63                       |
| Sulfur     | 693    | 4.99             | 2.57                       |
| Calcium    | 86     | 1.21             | 0.76                       |
| Molybdenum | 600    | 2.24             | 5.87                       |

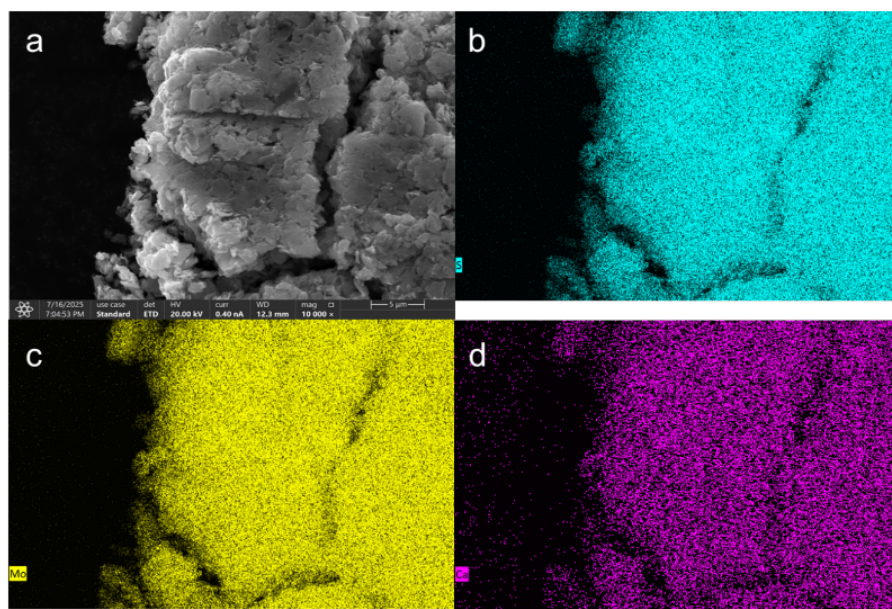

**Figure S19.** (a) SEM image of MoS<sub>2</sub> after reaction with 0.7 equivalents of calcium pyrenide in DMF and elemental mapping of (b) S, (c) Mo, and (d) Ca.

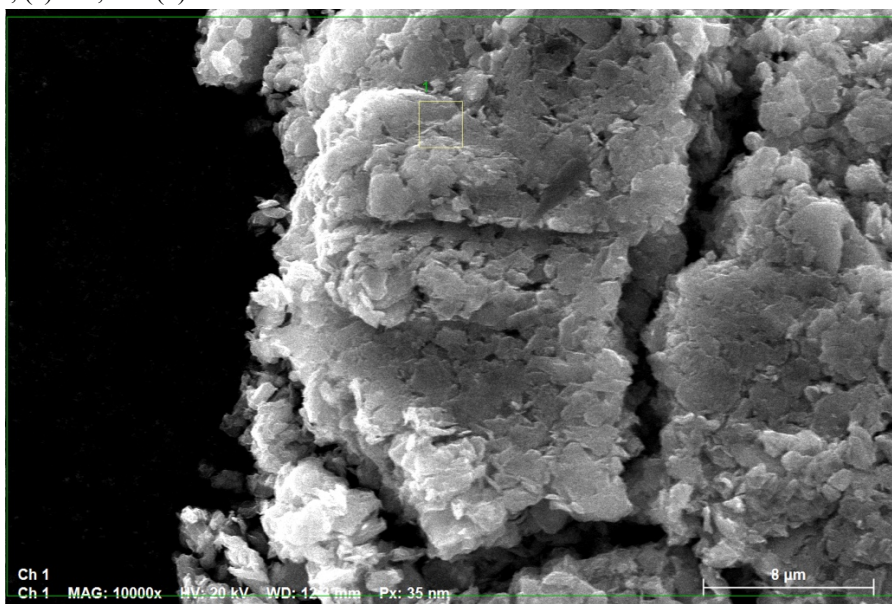

**Figure S20.** EDX spot of MoS<sub>2</sub> after reaction with 0.7 equivalents of calcium pyrenide in DMF.

**Table S6.** Elemental analysis from the EDX spot in Figure S19 for MoS<sub>2</sub> after reaction with 0.7 equivalents of calcium pyrenide in DMF.

| Element    | Counts | Atom percent (%) | 1 $\sigma$ Uncertainty (%) |
|------------|--------|------------------|----------------------------|
| Carbon     | 117    | 59.24            | 2.40                       |
| Oxygen     | 81     | 17.25            | 1.18                       |
| Sulfur     | 2715   | 14.44            | 2.10                       |
| Calcium    | 335    | 4.20             | 0.85                       |
| Molybdenum | 1696   | 4.87             | 5.01                       |

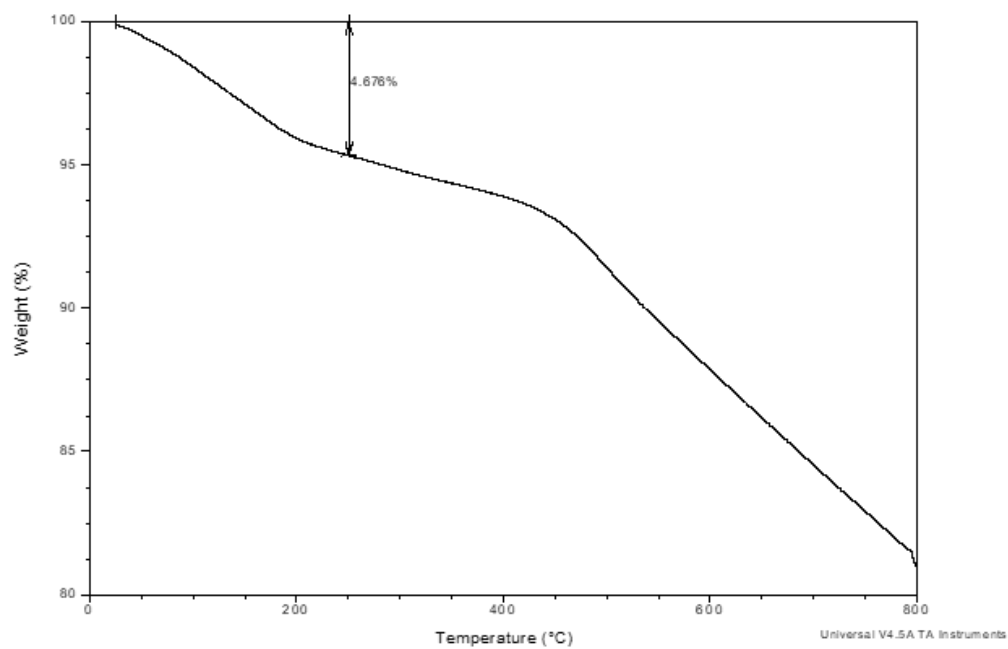

Figure S21. TGA of MoS<sub>2</sub> after reaction with 0.3 equivalents of calcium pyrenide in DMF.

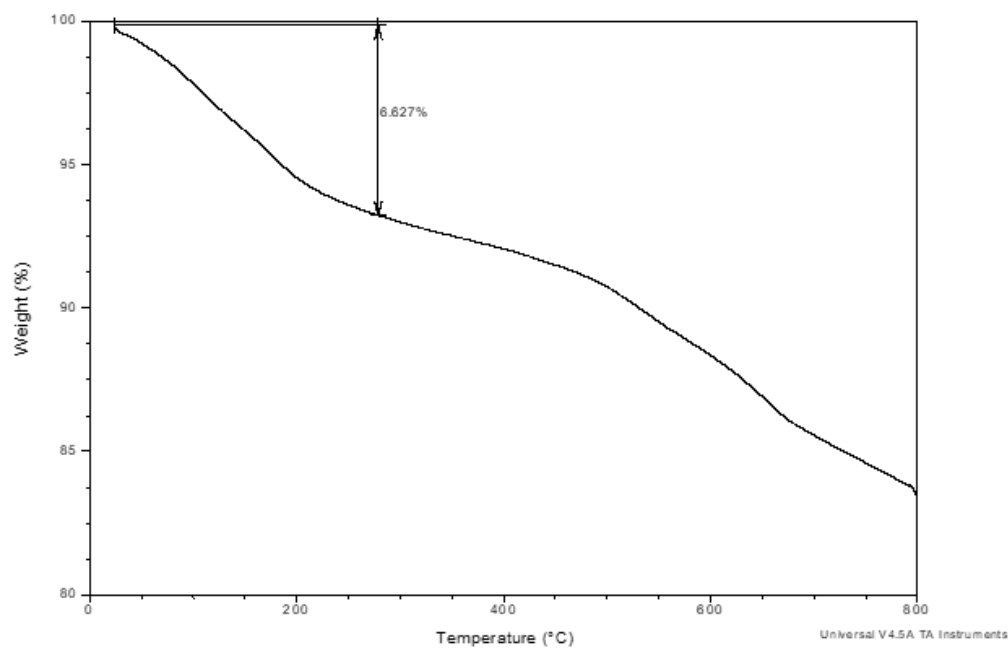

Figure S22. TGA of MoS<sub>2</sub> after reaction with 0.5 equivalents of calcium pyrenide in DMF.

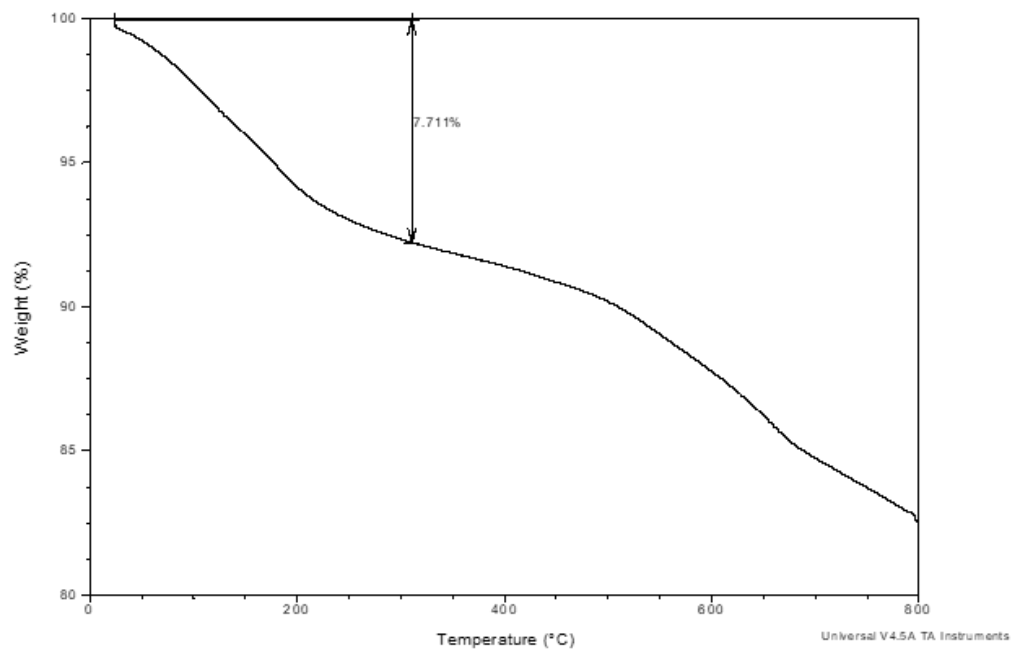

**Figure S23.** TGA of MoS<sub>2</sub> after reaction with 0.7 equivalents of calcium pyrenide in DMF.

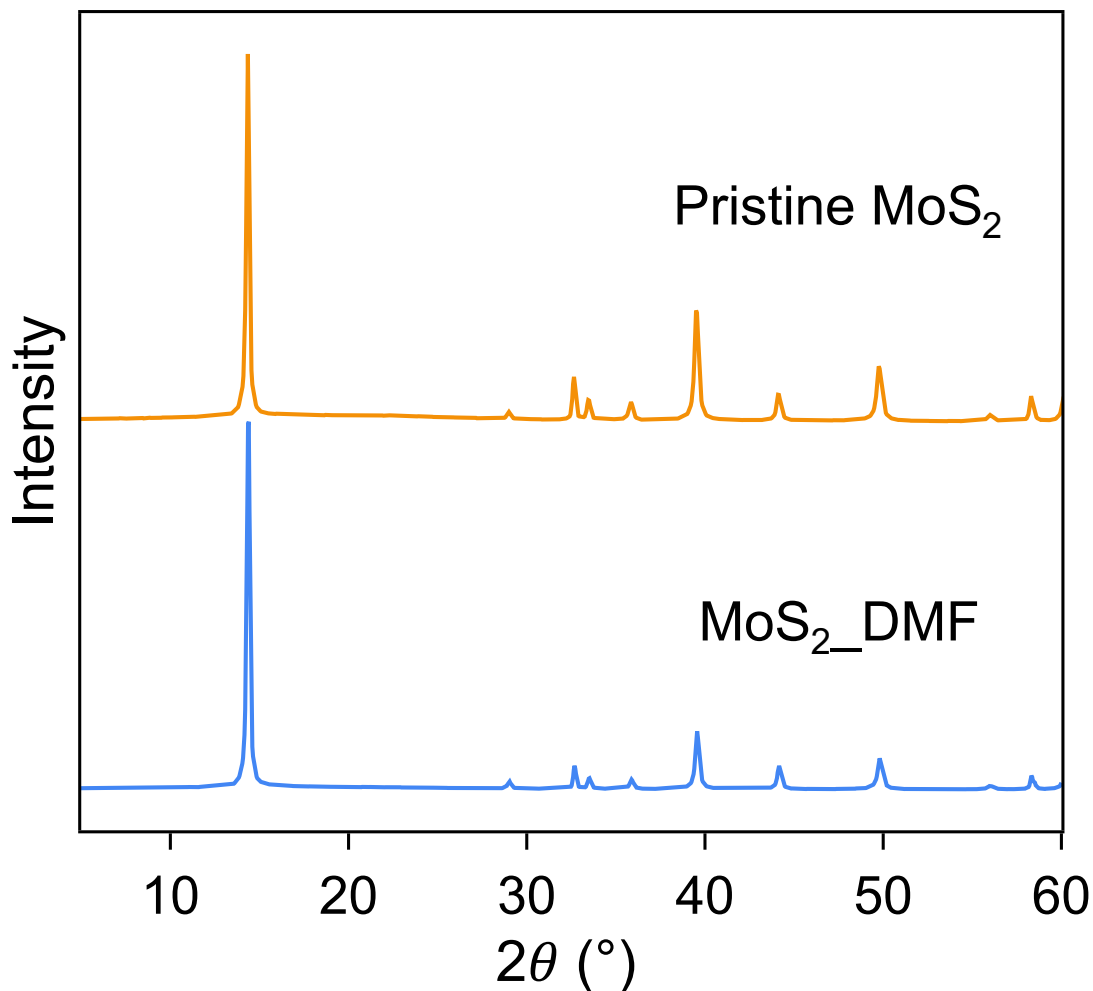

**Figure S24.** PXRD pattern of pristine MoS<sub>2</sub> (orange) and MoS<sub>2</sub> after stirring in DMF for 24 h (blue).

## References

- (41) Wilsey, R. B. LIII. The Crystalline Structures of Silver Iodide. *Lond. Edinb. Dublin Philos. Mag. J. Sci.* **1923**, *46* (273), 487–496. <https://doi.org/10.1080/14786442308634272>.
- (42) Vegard, L. IX. The Structure of Silver Crystals. *Lond. Edinb. Dublin Philos. Mag. J. Sci.* **1916**, *31* (181), 83–87. <https://doi.org/10.1080/14786440108635473>.
